# Supplementary material
Source: PubMed Central journal article supplement (PMC2533792)

ChIP primers:

*dg repeats*

P60: 5'-CCCTAACTTGGAAAGGCACA-3'

P61: 5'-TCTGCTCTGACTTGGCTTGT-3'

*ura4*

P88: 5'-AATACCGTCAAGCTACAATATGCATCTGGTG-3'

P89: 5'-GGTTTTCTCTGTGTAGGAACCAGTAGCC-3'

*dh repeats*

P90: 5'-TGAATCGTGTCACTCAACCC-3'

P91: 5'-CGAACTTTCAGATCTCGCC-3'

*act1*

KF123: 5'-CTCAAAGCAAGCGTGGTATTTTGAC-3'

KF125: 5'-ATCATCCCAGTTGTTGACAATACCG-3'

RT-qPCR primers:

*act1*

KF123: 5'-CTCAAAGCAAGCGTGGTATTTTGAC-3'

KF125: 5'-ATCATCCCAGTTGTTGACAATACCG-3'

*ura4*

KF119: 5'-CTGGTGGCCTTAGGTAAAAAGCATC-3'

KF121: 5'-AAGAGACCACGTCCCAAAGGTAAAC-3'

*dh repeats*

P90: 5'-TGAATCGTGTCACTCAACCC-3'

P91: 5'-CGAACTTTCAGATCTCGCC-3'

*dg repeats*

P60: 5'-CCCTAACTTGGAAAGGCACA-3'

P61: 5'-TCTGCTCTGACTTGGCTTGT-3'

*ago1*

P443: 5'-ATTTCCGTGACGGTACCTCGGA-3'

P444: 5'-GAAGAAACGAGCGTGATGTCTC-3'

*chp1*

P447: 5'-CGATTGTCAAGGCCAAAGCA-3'

P448: 5'-TTGTGTAGCTTGAAAAGCGCC-3'

*tas3*

P465: 5'-ACCATCCAGATAGTCGTTTCAG-3'

P466: 5'-AATGGGCTCCATGGTCTGATA-3'

*rdp1*

P461: 5'-CCCAAACGATATCCTGACTTCA-3'

P462: 5'-CCTTGGAAGTTTCATACAAGG-3'

*cid12*

P451: 5'-GGTAGATTGCTGATGCTATTG-3'

P452: 5'-GCTCGAATTGGTTGCACTTCCGAA-3'

*hrr1*

P459: 5'-GACAATGATGGCTTTGCTTCG-3'

P460: 5'-TCCCCTTGATACCCATCTACAGT-3'

*dcr1*

P455: 5'-AGTATCCTAACGCAACTTCTGG-3'

P456: 5'-AAGCAGTCTCCCTGAACGCTTCA-3'

Table 1. *S.pombe* strains used in this study

| Name  | Genotype                                                                                                                                               | Source     |
|-------|--------------------------------------------------------------------------------------------------------------------------------------------------------|------------|
| PM021 | P(h+), <i>ura4-DS/E</i> , <i>ade6-210</i> , <i>leu1-32</i> , <i>imr1R(NcoI)::ura4</i>                                                                  | K. Ekwall  |
| PM100 | <i>P(h+)</i> , <i>ura4-DS/E</i> , <i>ade6-M210</i> , <i>leu1-32</i> , <i>otr1R(SphI)::ura4 oriA</i>                                                    | D. Moazed  |
| PM102 | <i>h90</i> , <i>ura4-DS/E</i> , <i>ade6-M210</i> , <i>leu1-32</i> , <i>mat3M::ura4</i>                                                                 | D. Moazed  |
| PM251 | <i>P(h+)</i> , <i>ura4-DS/E</i> , <i>ade6-210</i> , <i>leu1-32</i> , <i>imr1L(NcoI)::ura4</i> , <i>otr1R(SphI)::ade6</i>                               | K. Ekwall  |
| PM275 | <i>h90</i> , <i>ura4-D18</i> , <i>ade6-210</i> , <i>leu1-32</i> , <i>his3D1</i> , <i>his3-tel(1L)</i> , <i>ura4-tel(2L)</i> , <i>otr1R(SphI)::ade6</i> | K. Ekwall  |
| PM343 | PM100, <i>ers1::kanMX</i>                                                                                                                              | This study |
| PM345 | PM100, <i>dcr1::kanMX</i>                                                                                                                              | This study |
| PM331 | PM100, <i>clr4::kanMX</i>                                                                                                                              | This study |
| PM346 | PM102, <i>ers1::kanMX</i>                                                                                                                              | This study |
| PM333 | PM102, <i>clr4::kanMX</i>                                                                                                                              | This study |
| PM348 | PM251, <i>ers1::kanMX</i>                                                                                                                              | This study |
| PM350 | PM251, <i>dcr1::kanMX</i>                                                                                                                              | This study |
| PM335 | PM251, <i>clr4::kanMX</i>                                                                                                                              | This study |
| PM352 | PM275, <i>ers1::kanMX</i>                                                                                                                              | This study |
| PM354 | PM021, CHP1-3HA<KAN>                                                                                                                                   | This study |
| PM356 | PM021, <i>ers1::hygMX</i> , CHP1-3HA<KAN>                                                                                                              | This study |
| PM358 | PM021, <i>dcr1::hygMX</i> , CHP1-3HA<KAN>                                                                                                              | This study |
| PM367 | PM021, <i>Ers1-TAP</i> <KAN>                                                                                                                           | This study |
| PM368 | PM021, <i>Swi6-TAP</i> <KAN>                                                                                                                           | This study |

Figure S1. Chp1 is stably expressed in the *ers1*Δ mutant. Shown is immunoblot analysis of two independent isolates of Chp1-3HA strains constructed in the indicated parental backgrounds.

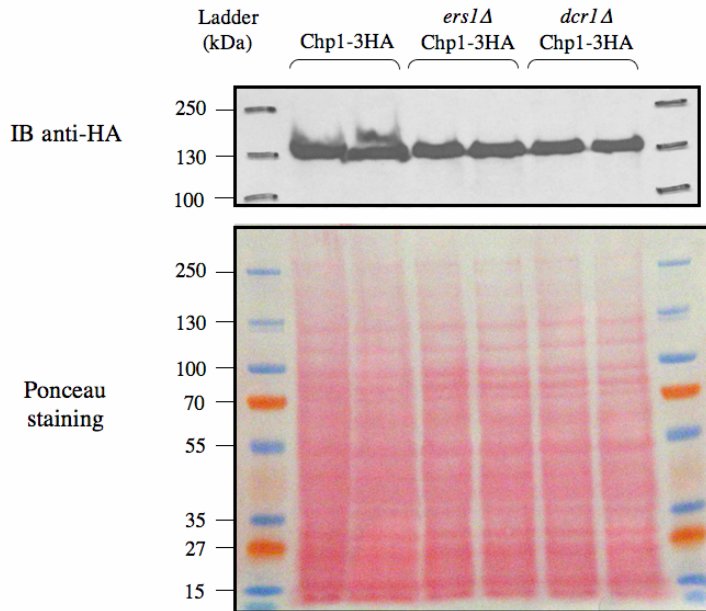

Figure S2. Expression of RNAi components in the *ers1*Δ mutant. RT-QPCR analysis of the expression of all known RNAi-specific components in strains of the indicated genotypes.

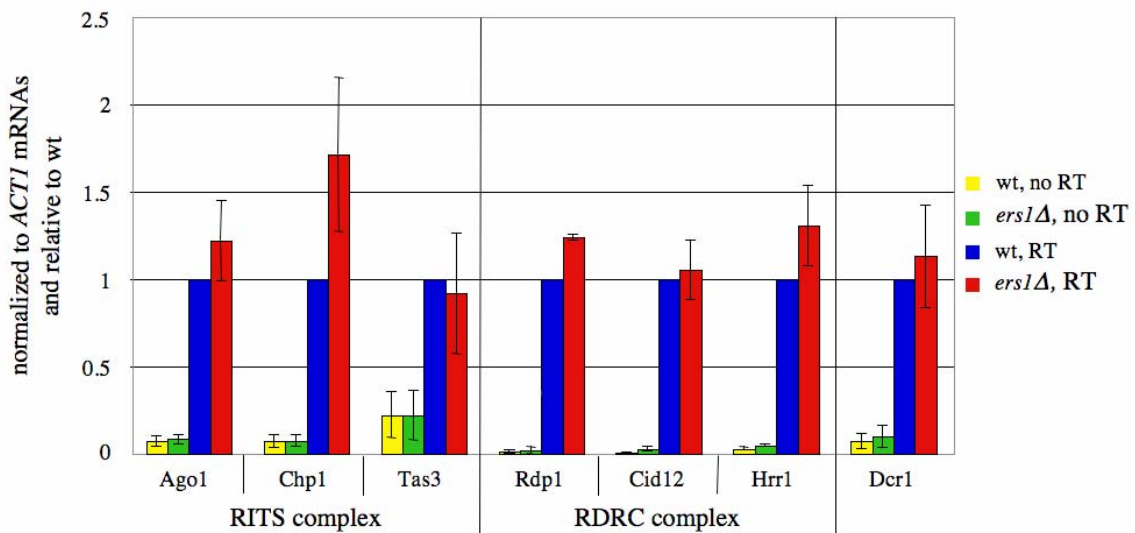

Figure S3. Ers1-TAP ChIP analysis. ChIP analysis was performed as in Fig. 1, except that 3% formaldehyde was used.

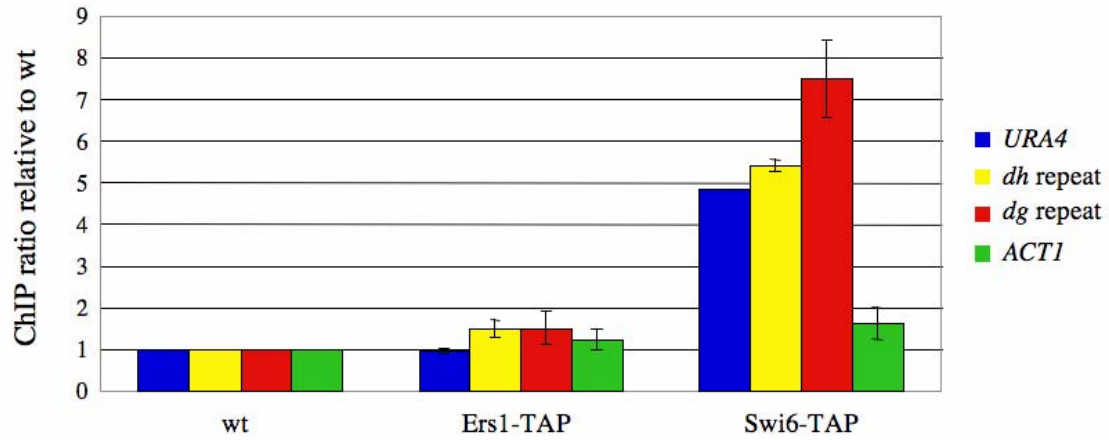

Supplement: supp_C800140200_Suppdata.pdf [file supp_C800140200_Suppdata.pdf]
